# Supplementary material for: High pressure behaviour and elastic properties of a dense inorganic–organic framework
Source: Royal Society of Chemistry journal article supplement (doi:10.1039/c5dt03505h), 2015-11-13
Supplement: c5dt03505h4.pdf [file c5dt03505h4.pdf]

## Supporting information

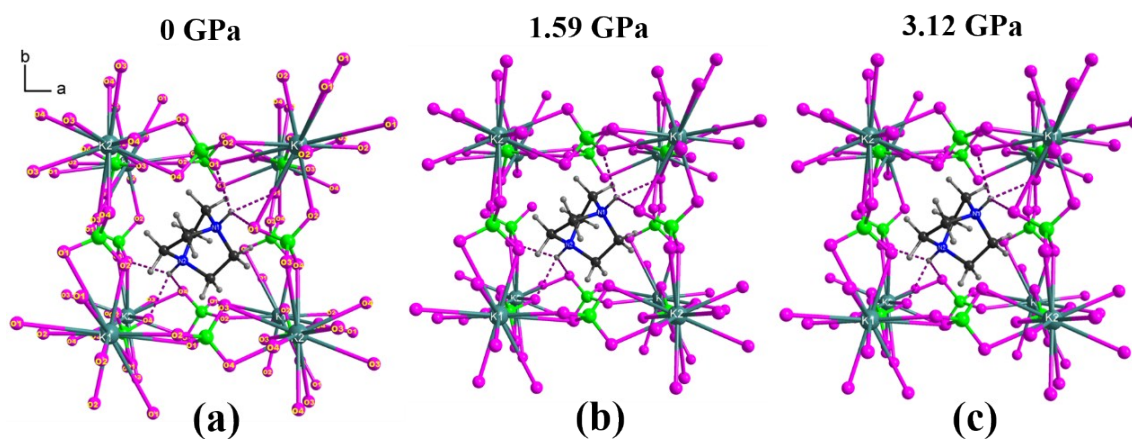

Fig. S1 The representation of the unit cell of  $[\text{DABCOH}_2^{2+}][\text{K}(\text{ClO}_4)_3]$  viewed along the cell axis, at 0 (a), 1.59 (b) and 3.12 GPa (c), refined from DFT based on experimental cell parameters. Colour scheme:  $\text{K}^+$ , teal; O, pink; Cl, green; C, black; N, blue; H, gray. N–H $\cdots$ O bonds are represented as dashed purple lines.

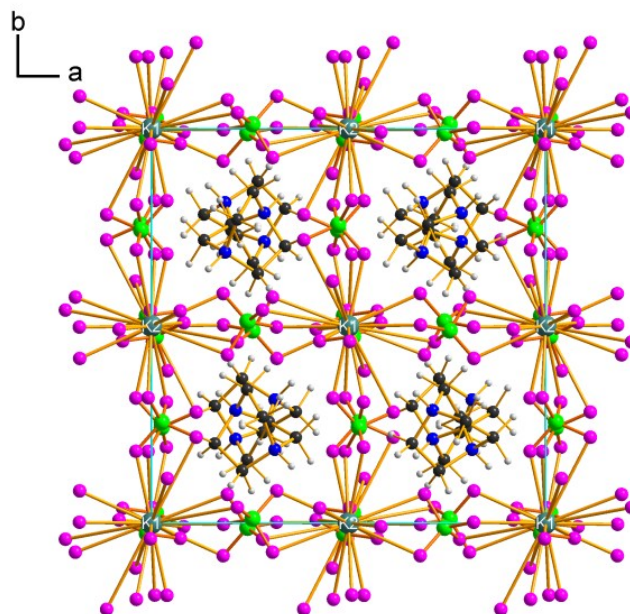

Fig. S2 The representation of the cell packing viewed along the cell axis. Colour scheme:  $\text{K}^+$ , teal; O, pink; Cl, green; C, black; N, blue; H, gray.
